# Supplementary material for: To Bag is to Prune
Source: publisher site journal article supplement (doi:10.1515/snde-2023-0030), 2024-10-25
Supplement: Supplementary file 1 [file j_snde-2023-0030_suppl_001.zip]

**README: Replication of *To Bag is to Prune***

## **Overview**

This repository, named **"replication_codes_final"** contains the necessary data and code to replicate Figures 1 through 7 and the Tables 2 and 3 from the paper **"To Bag is to Prune"** by Philippe Goulet Coulombe. This README will guide you through the replication process for each figure.

## **Repository Structure**

The repository is organized into subfolders, each corresponding to a figure or set of figures. Each folder contains the specific data and code needed to replicate the respective figure(s):

### **Folder Descriptions**

1. **Empirical/**
   - **data/:** contains the data that are used in the exercice
   - **results/:** output of empirical_results_loop.R
   - **tools/**:
     - tools/keras_mlp_cv.R – Keras function for a feed foreward neural network
     - tools/ booging_functions_pack4.R
     - tools/dataset-nocut.R– Generate the needed dataset
   - **Code**:
     - empirical_results_loop.R – The prediction out of sample code for generating Figures 1 and 5.
     - intro_bp_code_figure1.R – Replicate Figure 1
     - R2_barplots_figure5.R – Replicate plots from Figure 5
     - tables2_3_demo.R – Replicate results from Tables 2 and 3
2. **Section2_examples/**
   - **results/:** contains the output and of simulations_ols_vs_greedyls.R and simulations_R2_test.R
   - **tools/ :**
     - tools/datasets_nocut.R – Generate the needed dataset
     - tools/keras_mlp_cv.R – Keras function for a feed foreward neural network
     - tools/dataset-nocut.R– Generate the needed dataset
   - **Code :**
     - simulations_ols_vs_greedyls.R – Script for running the necessary simulations to generate Figure 2.
     - ols_vs_greedyls_plot_figure2.R – Script for generating the Figure 2.
     - simulations_R2_test.R – This script is used to perform the exercise needed to generate Figure 3.
     - R2_test_plot_figure3.R – Script for generating the Figure 3.
3. **Simulation/**
   - **results**/ :
     - **figure7**/ : contains the output of main_simu_fig7.R
     - **figure4_6**/ : contains the output of main_simu_fig4_6.R
   - **tools/ :**
     - booging_functions_pack3.R – Contains the model functions required for the simulations.
   - **Code:**
     - main_simu_figure4_6.R – Script for running simulations related to Figures 4 and 6.
     - main_simu_figure7.R – Script for running simulations related to Figure 7.
     - graphs_simu_figure7.R – Script to generate figure 7
     - graphs_simu_figure4_6.R – Script to generate figures 4 and 6

## **Data**

| **Abbreviation** | **Data Source** |
| --- | --- |
| Abalone | http://archive.ics.uci.edu/ml/datasets/Abalone |
| Boston Housing | http://lib.stat.cmu.edu/datasets/boston |
| Auto | https://archive.ics.uci.edu/ml/datasets/Auto+MPG |
| Bike Sharing | https://archive.ics.uci.edu/ml/datasets/Bike+Sharing+Dataset |
| White Wine | https://archive.ics.uci.edu/ml/datasets/Wine+Quality |
| Red Wine | https://archive.ics.uci.edu/ml/datasets/Wine+Quality |
| Concrete | https://archive.ics.uci.edu/ml/datasets/Concrete+Compressive+Strength |
| Fish Toxicity | https://archive.ics.uci.edu/ml/datasets/QSAR+fish+toxicity |
| Forest Fire | https://archive.ics.uci.edu/ml/datasets/Forest+Fires |
| NBA Salary | https://www.kaggle.com/aishjun/nba-salaries-prediction-in-20172018-season/data |
| CA Housing | https://www.kaggle.com/camnugent/california-housing-prices |
| Crime Florida | https://www.census.gov/data/datasets/1990/dec/summary-file-3.html |
| Friedman 1 R2=0.7 | https://cran.r-project.org/web/packages/tgp/vignettes/tgp.pdf |
| Friedman 1 R2=0.4 | https://cran.r-project.org/web/packages/tgp/vignettes/tgp.pdf |
| GDP H = 1 | https://drive.google.com/file/d/1NxDKvr-gyf2hhZS7oJ2h12vFk-N3SZAJ/view?usp=sharing |
| GDP H = 2 | https://drive.google.com/file/d/1NxDKvr-gyf2hhZS7oJ2h12vFk-N3SZAJ/view?usp=sharing |
| UNRATE H = 1 | https://drive.google.com/file/d/1NxDKvr-gyf2hhZS7oJ2h12vFk-N3SZAJ/view?usp=sharing |
| UNRATE H = 2 | https://drive.google.com/file/d/1NxDKvr-gyf2hhZS7oJ2h12vFk-N3SZAJ/view?usp=sharing |
| INF H = 1 | https://drive.google.com/file/d/1NxDKvr-gyf2hhZS7oJ2h12vFk-N3SZAJ/view?usp=sharing |
| INF H = 2 | https://drive.google.com/file/d/1NxDKvr-gyf2hhZS7oJ2h12vFk-N3SZAJ/view?usp=sharing |

## **Instructions for Replication**

The replication codes for this paper are organized into three sections: **Empirical**, **Simulation**, and **Section 2 examples**. The specific instructions for each part are detailed below. The needed packages are installed within the codes.

**Empirical**

This section is for replicating the empirical part of the paper, which includes Figures 1 and 5, as well as Tables 2 and 3.

1. **Main Script:** empirical_results_loop.R
   - Only modify the relative path variable ("path") in the code.
   - The results will be saved in the results/ folder under the name boog23nn_newcode_DS*.RData (where "*" is the dataset number).
2. **Figure 1:**
   - Use the script Figure1_intro_bp_code.R to reproduce Figure 1 from the paper.
   - Only modify the relative path variable ("path") in the code.
   - Output: figure1_bp_intro_abalone7.png
3. **Figure 5:**
   - Use the script Figure5_R2_barplots.R to generate the bar plots for Figure 5.
   - Only modify the relative path variable ("path") in the code.
   - Output: DS*_results_barplots.png (where "*" is the dataset number)
4. **Tables 2 and 3:**
   - Use the script tables2_3_demo.R to generate the results from Tables 2 and 3.
   - Only modify the relative path variable ("path") in the code.

**Section 2 - Examples**

This section is for replicating the simulation exercise, including Figures 2 and 3 from the paper.

1. **Figure 2**
   - Run the script simulations_ols_vs_greedyls.R to replicate the simulation results. Only modify the path variable ("path") in the code. The simulation results will be stored in the results/ folder. Output : NeuralNet_out_DS*.RData
   - Run the script ols_vs_greedyls_plot_figure2.R to generate Figure 2. Only modify the relative path variable ("path") in the code. Output: figure2_ols_vs_Greedy2.png
2. **Figure 3**
   - Run the script simulations_R2_test.R to replicate the simulation results.
   - Run the script R2_test_plot_figure3.R to generate Figure 3. Only modify the relative path variable ("path") in the code. Output : ols_vs_greedyls_results.RData
   - Output: figure3_NN_vs_RF.png

**Simulation**

This section is for replicating the simulation exercise, including Figures 4, 6, and 7 from the paper.

1. **Figures 4 and 6:**
   - Run the script main_simu_figure4_6.R to replicate the simulation results. Only modify the relative path variable ("path") in the code. The simulation results will be stored in the results/figure4_6/ folder.
   - Use the script graphs_simu_figure4_6.R to generate Figure 2. Only modify the path variable ("path") in the code.
   - Output: simulplot_mtry90_figure4.png and simulplot_mtry90_figure6.png
2. **Figure 7:**
   - Run the script main_simu_figure7.R to replicate the simulation results. Only modify the relative path variable ("path") in the code. The simulation results will be stored in the results/figure7/ folder.
   - Use the script graphs_simu_fig7.R to generate Figure 2. Only modify the path variable ("path") in the code.
   - Output: simulplot_mtry50_figure7.png

**Software Requirements**

To replicate the figures, the following software and packages are required:

- **R** version 3.6.3 has been used on Mac OS

### **R Packages:**

- glmnet
- rpart
- ranger
- mboost
- gbm
- ISLR
- caret
- dplyr
- mlbench
- AppliedPredictiveModeling
- knockoff
- earth
- pracma
- tgp
- ggplot2
- RColorBrewer
- reshape2
- readr
- GA
- e1071
- doParallel
- kernlab
- xts
- neverhpfilter
- grf
- EZtune
- tuneRanger
- party
- readxl
- forecast
- ggthemes
- extrafont
- scales
- wesanderson
- grid
- keras
- tensorflow
- bagofprunes (from <https://github.com/philgoucou/bagofprunes>)

**Troubleshooting**

If you encounter any issues, please ensure the following:

- All necessary R packages are installed.
- The data files are correctly placed in the specified folders.
- The relative path variable “path” is correct.
